# Supplementary material
Source: PubMed Central journal article supplement (PMC298717)
Supplement: pnas_0336594100_1.pdf [file pnas_0336594100_1.pdf]

**Table 1. Yeast strains and plasmids used in this study**

| Strain or plasmid | Description                                                                                                                                                              |
|-------------------|--------------------------------------------------------------------------------------------------------------------------------------------------------------------------|
| EGY48             | MAT $\alpha$ <i>ura3 his3 trp1 leu2::6LexAop-LEU2</i> plus pSH18-34 (1)                                                                                                  |
| ACY192            | MAT $\alpha$ <i>ura3 leu2 his3 trp1</i> (FY23) (2)                                                                                                                       |
| ACY194            | MAT $\alpha$ <i>ura3 leu2 his3 rat7-1ts</i> (3)                                                                                                                          |
| ACY683            | MAT $\alpha$ <i>leu2 trp1 can1 ade2 MLP1-proteinA::HIS3</i> (CSCD15a) (4)                                                                                                |
| pSH18-34          | 8 ops- <i>lacZ</i> , 2 $\mu$ , <i>URA3</i>                                                                                                                               |
| pEG202            | pADH, <i>LexA-DBD</i> , 2 $\mu$ , <i>HIS3</i> (1)                                                                                                                        |
| pJG4-5            | pGAL1, <i>B42-AD-HA</i> , 2 $\mu$ , <i>TRP1</i> (1)                                                                                                                      |
| pGEX-4T3          | GST bacterial expression vector, <i>amp<sup>r</sup></i> (Amersham Pharmacia)                                                                                             |
| pAC2              | pRS314, <i>CEN</i> , <i>TRP</i> (5)                                                                                                                                      |
| pAC19             | pGAL, 2 $\mu$ , <i>LEU2</i>                                                                                                                                              |
| pAC213            | <i>NLS-NES-GFP</i> , 2 $\mu$ , <i>URA3</i> (6, 7)                                                                                                                        |
| pAC719            | <i>NAB2-GFP</i> , 2 $\mu$ , <i>URA3</i> (8)                                                                                                                              |
| pAC943            | <i>NPL3-c-myc</i> , <i>CEN</i> , <i>LEU2</i> (9)                                                                                                                         |
| pAC963            | <i>SRP1-c-myc</i> (3X), <i>CEN</i> , <i>TRP</i>                                                                                                                          |
| pAC980            | $\Delta$ <i>RGG</i> ( $\Delta$ 600-793) - <i>NAB2-GFP</i> , 2 $\mu$ , <i>URA3</i>                                                                                        |
| pAC1024           | pGAL, <i>NLS-GFP</i> reporter, 2 $\mu$ , <i>URA3</i>                                                                                                                     |
| pAC1101           | <i>NAB2</i> ORF in pEG202 to create <i>DBD-NAB2</i> , 2 $\mu$ , <i>HIS3</i>                                                                                              |
| pAC1126           | <i>NAB2-c-myc</i> (3X), <i>CEN</i> , <i>TRP</i>                                                                                                                          |
| pAC1195           | <i>AD-MLP1</i> (4470-stop) in pJG4-5, 2 $\mu$ , <i>TRP1</i> (Origene)                                                                                                    |
| pAC1196           | pGAL, <i>CT-MLP1</i> (4470-stop), 2 $\mu$ , <i>LEU2</i>                                                                                                                  |
| pAC1197           | pGAL, <i>CT-MLP1-GFP</i> (4470-stop), 2 $\mu$ , <i>URA3</i>                                                                                                              |
| pAC1313           | pGAL, <i>FL-MLP1</i> in modified pYES2 (Invitrogen), 2 $\mu$ , <i>URA3</i> (4)                                                                                           |
| pAC1315           | pGAL, $\Delta$ <i>CT-MLP1</i> (1-4466) in modified pYES2, 2 $\mu$ , <i>URA3</i> , C-terminal domain was deleted by removing <i>XhoI-XhoI</i> fragment from pAC1313       |
| pAC1340           | <i>GST-CT-MLP1</i> (4470-stop) in pGEX-4T3, <i>amp<sup>r</sup></i> , <i>CT-MLP1</i> was created by PCR and cloned into pGEX-4T3 via <i>Bam</i> HI and <i>Xho</i> I sites |

1. Gyuris, J., Golemis, E., Chertkov, H. & Brent, R. (1993) *Cell* **75**, 791–803.
2. Winston, F., Dollard, C. & Ricupero-Hovasse, S. L. (1995) *Yeast* **11**, 53–55.
3. Gorsch, L. C., Dockendorff, T. C. & Cole, C. N. (1995) *J. Cell Biol.* **129**, 939–955.
4. Strambio-de-Castillia, C., Blobel, G. & Rout, M. P. (1999) *J Cell Biol.* **144**, 839–855.
5. Sikorski, R. S. & Hieter, P. (1989) *Genetics* **122**, 19–27.

6. Stade, K., Ford, C. S., Guthrie, C. & Weis, K. (1997) *Cell* **90**, 1041–1050.
7. Taura, T., Krebber, H. & Silver, P. (1998) *Proc. Natl. Acad. Sci. USA* **95**, 7427–7432.
8. Green, D. M., Marfatia, K. A., Crafton, E. B., Zhang, X., Cheng, X. & Corbett, A. H. (2002) *J. Biol. Chem.* **277**, 7752–7760.
9. Henry, M. F. & Silver, P. A. (1996) *Mol. Cell. Biol.* **16**, 3668–3678.
